# Alexithymia Is Associated with Greater Risk of Chronic Pain and Negative Affect and with Lower Life Satisfaction in a General Population: The Hisayama Study

Mao Shibata<sup>1,2,3</sup>, Toshiharu Ninomiya<sup>3,4</sup>, Mark P. Jensen<sup>5</sup>, Kozo Anno<sup>1</sup>, Koji Yonemoto<sup>6</sup>, Seiko Makino<sup>1</sup>, Rie Iwaki<sup>1</sup>, Koji Yamashiro<sup>1</sup>, Toshiyuki Yoshida<sup>7</sup>, Yuko Imada<sup>1</sup>, Chiharu Kubo<sup>2</sup>, Yutaka Kiyohara<sup>3</sup>, Nobuyuki Sudo<sup>1,2</sup>, Masako Hosoi<sup>2\*</sup>

**1** Department of Psychosomatic Medicine, Graduate School of Medical Sciences, Kyushu University, Fukuoka, Japan, **2** Department of Psychosomatic Medicine, Kyushu University Hospital, Fukuoka, Japan, **3** Department of Environmental Medicine, Graduate School of Medical Sciences, Kyushu University, Fukuoka, Japan, **4** Department of Medicine and Clinical Science, Graduate School of Medical Sciences, Kyushu University, Fukuoka, Japan, **5** Department of Rehabilitation Medicine, University of Washington, Seattle, Washington, United States of America, **6** Biostatistics Center, Kurume University, Fukuoka, Japan, **7** Department of Speech and Hearing Sciences, International University of Health and Welfare, School of Health Sciences at Fukuoka, Fukuoka, Japan

## Abstract

**Introduction:** Chronic pain is a significant health problem worldwide, with a prevalence in the general population of approximately 40%. Alexithymia — the personality trait of having difficulties with emotional awareness and self-regulation — has been reported to contribute to an increased risk of several chronic diseases and health conditions, and limited research indicates a potential role for alexithymia in the development and maintenance of chronic pain. However, no study has yet examined the associations between alexithymia and chronic pain in the general population.

**Methods:** We administered measures assessing alexithymia, pain, disability, anxiety, depression, and life satisfaction to 927 adults in Hisayama, Japan. We classified the participants into four groups (low-normal alexithymia, middle-normal alexithymia, high-normal alexithymia, and alexithymic) based on their responses to the alexithymia measure. We calculated the risk estimates for the criterion measures by a logistic regression analysis.

**Results:** Controlling for demographic variables, the odds ratio (OR) for having chronic pain was significantly higher in the high-normal (OR: 1.49, 95% CI: 1.07–2.09) and alexithymic groups (OR: 2.56, 95% CI: 1.47–4.45) compared to the low-normal group. Approximately 40% of the participants belonged to these two high-risk groups. In the subanalyses of the 439 participants with chronic pain, the levels of pain intensity, disability, depression, and anxiety were significantly increased and the degree of life satisfaction was decreased with elevating alexithymia categories.

**Conclusions:** The findings demonstrate that, in the general population, higher levels of alexithymia are associated with a higher risk of having chronic pain. The early identification and treatment of alexithymia and negative affect may be beneficial in preventing chronic pain and reducing the clinical and economic burdens of chronic pain. Further research is needed to determine if this association is due to a causal effect of alexithymia on the prevalence and severity of chronic pain.

**Citation:** Shibata M, Ninomiya T, Jensen MP, Anno K, Yonemoto K, et al. (2014) Alexithymia Is Associated with Greater Risk of Chronic Pain and Negative Affect and with Lower Life Satisfaction in a General Population: The Hisayama Study. PLoS ONE 9(3): e90984. doi:10.1371/journal.pone.0090984

**Editor:** Masabumi Minami, Hokkaido University, Japan

**Received:** October 11, 2013; **Accepted:** February 6, 2014; **Published:** March 12, 2014

**Copyright:** © 2014 Shibata et al. This is an open-access article distributed under the terms of the Creative Commons Attribution License, which permits unrestricted use, distribution, and reproduction in any medium, provided the original author and source are credited.

**Funding:** MH was supported in part by Grants-in-Aid for Scientific Research C (number 21590766) from the Ministry of Education, Culture, Sports, Science, and Technology of Japan; and for the Health and Labor Sciences Research from the Ministry of Health, Labor and Welfare of Japan (H23-Pain-Shitei-005). The funders had no role in study design, data collection and analysis, decision to publish, or preparation of the manuscript.

**Competing Interests:** The authors have declared that no competing interests exist.

\* E-mail: hosoi@cephal.med.kyushu-u.ac.jp

## Introduction

Chronic pain is a common problem, with prevalence estimates at approximately 40% of the general population [1,2]. The impact of pain on economies is enormous. For example, the cost of back pain alone is equivalent to more than one-fifth of one country's total health expenditure and to 1.5% of the annual gross domestic product of the UK [3]. In addition to its economic impact, chronic

pain is arguably one of the health care issues with the greatest negative impact on quality of life.

Chronic pain is known to have significant biological, psychological, and social causes and consequences [4–6], and thus adequate pain assessments and treatments should address all of these factors. In order to expand the potential targets of pain treatment and therefore help minimize the prevalence of the

negative impacts of chronic pain, research is needed to identify the biopsychosocial factors that are most consistently associated with pain and pain-related outcomes.

A potential factor that may contribute to the development and maintenance of chronic pain is alexithymia [7,8]. Alexithymia is the label used to describe a personality trait associated with an inability to regulate negative affect [9]. The term is derived from Greek, and literally means “a lack of words for feelings” [10]. Alexithymia is a disturbance of both cognitive and affective functioning characterized by difficulty in recognizing or describing one’s emotions. The most common measure of alexithymia is the 20-item Toronto Alexithymia Scale (TAS-20) [11]. The TAS-20 assesses three components of alexithymia: (1) difficulty identifying feelings (DIF); (2) difficulty describing feelings (DDF); and (3) externally-oriented thinking (EOT).

In our previous research, we found a measure of alexithymia to be positively associated with pain intensity and interference, and negatively associated with vitality in a sample of individuals with neuromuscular disease and chronic pain [12]. We also found evidence that the effects of alexithymia on pain may be mediated by negative affect [13]. Additionally, research in pain populations by our group and others has identified the TAS-20 DIF scale as the most consistent factor associated with chronic pain and pain-related dysfunction [7,14,15]. However, the studies addressing the relationship between alexithymia and chronic pain to date have used participants who are not necessarily representative of the population (e.g., patients, transit workers, and students), which limits the generalizability of extant findings. To our knowledge, there are no studies examining the role that alexithymia might play in comprehensive chronic pain in a general population.

To elucidate this association, we performed a population-based cross-sectional survey in a Japanese community. We hypothesized that (1) the measure of alexithymia is associated with chronic pain, (2) this association is mediated by negative affect, and (3) the DIF domain of alexithymia is associated with criterion measures stronger than the other components of alexithymia. Our planned analyses regarding the associations between alexithymia and measures of additional pain-related outcomes (specifically, pain intensity, depression, anxiety, disability, and life satisfaction) were considered exploratory, as these associations have not yet been tested in prior research.

## Methods

### 1. Study participants

The Hisayama Study is an ongoing, long-term cohort study examining cardiovascular disease and its risk factors in Hisayama, a suburban town adjoining Fukuoka City, a metropolitan area in southern Japan. Full community surveys of the health status of residents aged 40 and older have been repeated every five years since 1961 [16]. Data for the present study were taken from responses to questions regarding pain and psychological functioning included in the whole survey administered in 2010.

Among 2,223 residents aged 40 and older who participated in the health survey, a total of 1,027 residents (participation rate: 46%) consented to participate in these questions of the 2010 whole survey. Of these, 66 had missing data and 34 did not complete the questionnaires, leaving a final sample of 927 participants (326 men and 601 women) (Fig. S1). This study was approved by the Kyushu University Institutional Review Board for Clinical Research. Written informed consent was obtained from all participants.

## 2. Measures

**2.1. Alexithymia.** Alexithymia was assessed for each participant using the 20-item Toronto Alexithymia Scale (TAS-20), which is the most psychometrically valid measurement of alexithymia [11]. As mentioned above, the TAS-20 consists of 20 statements that reflect three domains of alexithymia: (1) DIF; (2) DDF; and (3) EOT. Each item is rated on a 5-point Likert scale, with 1 = “strongly disagree” and 5 = “strongly agree.”

We classified the participants as alexithymic (TAS-20 score >60) or non-alexithymic (TAS-20 score ≤60) based on their total TAS-20 scores according to previous studies [9], and subsequently classified the non-alexithymic group into three subgroups: low-normal alexithymia (score <44), middle-normal alexithymia (score 44–50) and high-normal alexithymia (score 51–60) based on their tertile values. In addition to the tertile values in this study, a total score of 51–60 has been defined as “borderline alexithymia” or “possible alexithymia” in some studies [17]. We also divided the TAS-20 subscale scores of the three domains into quartiles, as there are no published cutoffs for classifying individuals into alexithymic groups for the TAS-20 subscales. The Japanese version of the TAS-20 has been shown to be both reliable and valid [18].

**2.2. Assessment of presence of acute and chronic pain.** The International Association for the Study of Pain (IASP) defines pain as “an unpleasant sensory and emotional experience associated with actual or potential tissue damage, or described in terms of such damage” and also explains that “Pain is always subjective.” The definition of ‘chronic’ pain based on duration has not been clearly established, but 3 or 6 months or more is generally used [19,20]. According to this definition, we defined chronic pain as having any subjective pain for more than 6 months.

As part of the Hisayama Study health survey, the participants were asked to indicate whether they experienced any pain and how long the pain has lasted. Those who reported <6 months of pain and those with pain that had been experienced for 6 months or longer were classified as having acute (i.e., recent onset) and chronic pain, respectively. For complementary information, the participants with pain were asked to select their primary pain site using the IASP site categories [19]: 1 = head and face, 2 = neck, 3 = shoulder and arms, 4 = chest, 5 = back, 6 = stomach, 7 = low back, 8 = legs, 9 = pelvic and genital area, 10 = pain at more than one site.

**2.3. Pain intensity.** The participants were asked to rate the average intensity of their pain in the past week on a 100-mm visual analogue scale (VAS). Anchors were “No pain” (0 mm) and “Pain as bad as it could be (100 mm).” A great deal of evidence supports the reliability and validity of the VAS as a measure of pain intensity [21].

**2.4. Disability.** Participants were asked to rate their average disability in the past week on a 100-mm VAS. Anchors were “No disability” (0 mm) and “Disability as bad as it could be (100 mm) [22].”

**2.5. Life satisfaction.** Participants were asked to rate their global life satisfaction on a 100-mm VAS. Anchors were “Feeling no life satisfaction at all” (0 mm) and “Feeling life satisfaction as good as it could be (100 mm) [23].”

**2.6. Negative affect.** Negative affect was measured with the depression and anxiety scales of a Japanese version of the Symptom Checklist 90-revised (SCL-90-R). SCL-90-R scales have established validity and reliability [24].

**2.7. Demographic/descriptive variables and covariates.** Age, sex, marital status, educational level, and economic status are factors that could potentially influence both

pain and alexithymia and were therefore assessed and controlled in all analyses. Marital status was classified as never married, divorced, separated, widowed, married, or cohabiting. Educational level was classified as one of three education duration categories: under 9 years, 9–12 years, or over 12 years. Economic status was assessed by a question asking, ‘How difficult or easy is your current financial status?’ Response options for this question were ‘Very hard,’ ‘Hard,’ ‘Normal,’ ‘Easy,’ and ‘Very easy.’ Based on the participant’s response, economic status was divided into three classes: low (very hard or hard), average (normal), and high (easy and very easy). Similar one-item questions about economic status have demonstrated validity through their associations with psychological and physical health [25].

### 3. Statistical analysis

We first computed the means and standard deviations, medians and interquartile ranges (of continuous variables), and rates (of categorical variables) of the study variables for descriptive purposes. To better understand the association between alexithymia and potential confounding factors (i.e., age, sex, marital status, educational level, and economic status), we examined their trend tests using a linear regression analysis, logistic regression analysis, or the Jonckheere-Terpstra test, as appropriate. Logistic regression analysis was used to examine the unadjusted and adjusted odds ratios (ORs) with 95% confidence intervals (CIs) and *p* for trend of chronic pain according to the TAS-20 score levels taken as categorical variables. In the multivariable-adjusted model, adjustments were made for age, sex, marital status, years of education, and economic status. We estimated the ORs per 1-point increment in the TAS-20 score using the relevant logistic model including the TAS-20 score taken as a continuous variable. The heterogeneity in the association between sexes was tested by adding the interaction term to the relevant logistic model. We also estimated the association (ORs and *p* for trend) between the quartiles of the TAS-20 subscales and the presence of chronic pain using logistic regression analysis. The trends in the dose-response associations between TAS-20 score levels and the pain intensity, disability, anxiety, depression, and life satisfaction were tested using the Jonckheere-Terpstra trend test for the participants with chronic pain. The SAS software package version 9.2 (SAS Institute, Cary, NC, USA) was used for all analyses. Two-sided values of *p* < 0.05 were considered significant in all analyses.

## Results

The characteristics of the study sample are summarized in Table 1 as a function of the TAS-20 categories. The prevalence of alexithymic (TAS-20 > 60) in all participants was 7.8% (*n* = 72; 35 men, 37 women). There were significant associations between the TAS-20 categories and both education level and economic status, with lower education level and lower economic status associated with higher levels of the TAS-20 categories relative to those with higher education level or economic status. The scores for negative affect, such as depression and anxiety symptoms, were significantly increased with elevating TAS-20 categories. No significant associations were found between the TAS-20 categories and age, sex, or marital status.

Approximately 47% of the participants (*n* = 439; 152 men, 287 women) were classified as having chronic pain, and 17.9% (*n* = 166; 41 men, 125 women) were classified as having acute pain. For those with pain, the primary pain sites were the low back (30.1%), shoulders and arms (30.1%), legs (19.6%), head, face, or neck (13.2%), and other sites (7.2%) in the chronic pain group, and shoulders and arms (34.9%), low back (22.9%), legs (16.9%), head,

face, or neck (15.0%), back (6.0%), and other sites (4.2%) in the acute pain group. The prevalence of alexithymic turned out to be 4.0% in the painless group, 6.6% in the acute pain group, and 10.9% in the chronic pain group.

The prevalence of pain as a function of the TAS-20 categories is shown in Figure 1. As the scores of the TAS-20 categories increased, the prevalence of chronic pain increased and that of ‘no pain’ decreased.

Table 2 shows the unadjusted and multivariable-adjusted ORs for the presence of chronic pain according to the TAS-20 categories. Compared with the low-normal alexithymia group, the unadjusted ORs for the presence of chronic pain were significantly higher, around twofold higher, in the high-normal alexithymia and alexithymic groups. After adjusting for age, sex, marital status, years of education, and economic status, this association remained substantially unchanged. Approximately 40% of the participants belonged to these two (high-normal alexithymia and alexithymic) high-risk groups.

As a continuous variable, every 1-point increment in the TAS-20 score was associated with a 1.04-times (95% CI: 1.02–1.06) higher likelihood of the presence of chronic pain after the adjustment for the aforementioned confounding factors. The subgroup analysis stratified by sex showed that the odds ratios in the high-normal alexithymia and alexithymic groups were significant for both sexes, without any evidence of significant heterogeneity in the association between sexes (*p* for heterogeneity = 0.54).

Because including the participants with acute pain in the group without chronic pain in the present analysis may have underestimated the association, we examined the difference between the chronic pain and no-pain groups only. In these analyses, the odds ratios were even higher in the high-normal alexithymia group (OR: 2.05, 95% CI: 1.40–3.00) and alexithymic group (OR: 3.60, 95% CI: 1.83–7.08). The relationships between TAS-20 categories and chronic pain became nonsignificant after adjusting for depression symptoms (*p* for trend = 0.57) or for anxiety symptoms (*p* for trend = 0.57).

Figure 2 presents the odds ratios for chronic pain as a function of quartiles of the TAS-20 subscales score, controlled for demographic factors. There were significant differences between the first quartile and both the third and the fourth quartiles in DIF subscale score. There was also a significant difference between the first quartile and the fourth quartile in DDF subscale score. However, there was no significant association between the EOT subscale score quartiles and the presence of chronic pain. Thus, the TAS-20 DIF subscale demonstrated the strongest association with the presence of chronic pain, although in this sample the TAS-20 DDF subscale may also play a role.

Table 3 shows the association between the TAS-20 categories and pain-related outcomes of the 439 participants with chronic pain. As the level of the TAS-20 categories increased, so did the levels of pain intensity, disability, and depression and anxiety symptoms. The TAS-20 categories were negatively associated with life satisfaction.

## Discussion

To our knowledge, this is the first study to examine the association between alexithymia and chronic pain in a sample that is representative of the general population. As hypothesized, we found that alexithymia is significantly associated with a higher prevalence of chronic pain and that this association is mediated by negative affect, such as depression and anxiety symptoms. Also as hypothesized, the TAS-20 subscale assessing difficulty identifying

**Table 1.** Characteristics of the study population according to the TAS-20 score level.

|                                         | Total            | TAS-20 score     |                  |                  |                  | p for trend |
|-----------------------------------------|------------------|------------------|------------------|------------------|------------------|-------------|
|                                         |                  | Low-normal       | Middle-normal    | High-normal      | Alexithymic      |             |
|                                         |                  | <44              | 44–50            | 51–60            | >60              |             |
|                                         | n = 927          | n = 278          | n = 283          | n = 294          | n = 72           |             |
| <i>Sociodemographic characteristics</i> |                  |                  |                  |                  |                  |             |
| Age, year                               | 61±11            | 60±11            | 61±11            | 61±11            | 63±13            | 0.10        |
| Women, %                                | 64.8             | 64.7             | 66.4             | 66.7             | 51.4             | 0.32        |
| Marital status (married/cohabiting), %  | 81.8             | 86.0             | 78.1             | 80.6             | 84.7             | 0.33        |
| Educational levels (under 9 years), %   | 17.0             | 11.2             | 15.9             | 21.4             | 26.4             | <0.001      |
| Economic status (low), %                | 19.6             | 17.3             | 16.3             | 22.8             | 29.2             | 0.01        |
| <i>Negative affect</i>                  |                  |                  |                  |                  |                  |             |
| Depression symptom, score               | 0.69 (0.46–1.00) | 0.54 (0.31–0.77) | 0.62 (0.38–0.85) | 0.85 (0.62–1.23) | 1.31 (0.85–1.77) | <0.001      |
| Anxiety symptom, score                  | 0.40 (0.20–0.70) | 0.20 (0.10–0.40) | 0.30 (0.20–0.50) | 0.60 (0.30–0.80) | 1.00 (0.60–1.30) | <0.001      |

Values are means ± std. dev. or frequencies or median (interquartile range).  
 The TAS-20: the 20-item Toronto Alexithymia Scale.  
 doi:10.1371/journal.pone.0090984.t001

feelings is more closely associated with pain than the other two TAS-20 subscales. We also found that alexithymia was associated with measures of additional pain-related quality of life domains (depression, anxiety, disability, and satisfaction with life) in the subsample of individuals with chronic pain. These findings have important implications for understanding pain and promoting general health.

**1. Comparison with previous reports**

The prevalence of alexithymic was reported to be approximately 10% in studies based in Finland (age range: 30–97 years) and Germany (age range: 20–69 years) [26,27]. Our prevalence result, 7.8% (age range: 40–91 years), is probably lower because our participants did not include younger people (in their 20 s), who have been reported to have relatively high TAS-20 scores in Japan [18]. Although as far as we know there are no population-based studies on the relationship between alexithymia and chronic

pain, there are some hospital-based cross-sectional studies for various patient populations. Most of these studies found a positive association between alexithymia and the presence of chronic pain [15,28–30].

For example, Mehling and Krause reported that scoring in the upper quartile of the alexithymia total score was associated with twofold (adjusted OR = 2.00, 95%CI: 1.31–3.00) higher odds of the 12-month prevalence of low back pain, which was assessed by the medical history taken during the drivers’ relicensing exams of 1,180 San Francisco transit operators [8]. These results are consistent with our finding. However, several studies have shown negative [31–33] or mixed correlations [34]. The discrepancy in correlations may be due to differences in health status or study design (e.g., using healthy controls or patient controls).

A population-based prospective longitudinal study [35] was conducted with the same population as that in the aforementioned cross-sectional study by Mehling and Krause [8]. The longitudinal

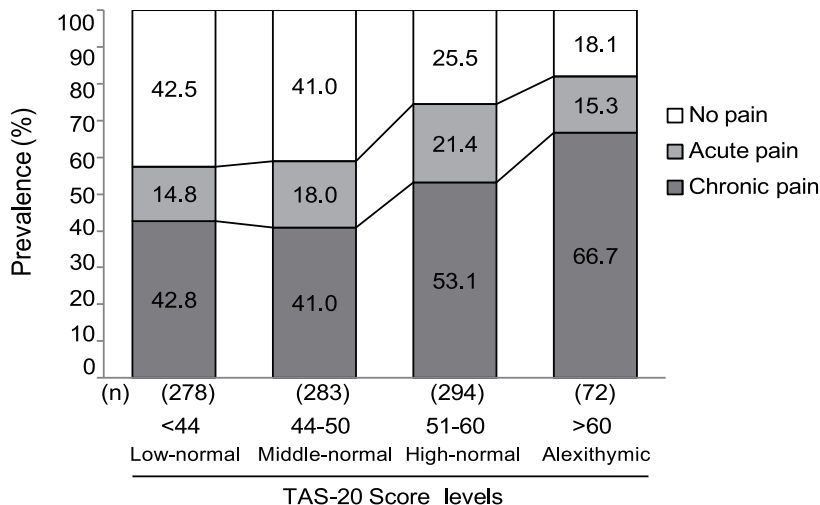

**Figure 1.** Self-reported pain prevalence according to the TAS-20 score levels in a general population from the Hisayama Study health survey. Acute pain: <6 months of pain. Chronic pain: pain that had been experienced for 6 months or longer.  
 doi:10.1371/journal.pone.0090984.g001

**Table 2.** Odds ratios for chronic pain according to the TAS-20 category score.

| Alexithymia level | TAS-20 score | Number of participants | Number with Chronic pain | Unadjusted       |         |             | Multivariable-adjusted |         |             |
|-------------------|--------------|------------------------|--------------------------|------------------|---------|-------------|------------------------|---------|-------------|
|                   |              |                        |                          | OR (95%CI)       | p value | p for trend | OR (95%CI)             | p value | p for trend |
| <i>Total</i>      |              |                        |                          |                  |         |             |                        |         |             |
| Low-normal        | <44          | 278                    | 119                      | 1.00 (reference) |         |             | 1.00 (reference)       |         |             |
| Middle-normal     | 44–50        | 283                    | 116                      | 0.93 (0.66–1.30) | 0.66    | <0.001      | 0.91 (0.65–1.28)       | 0.6     | <0.001      |
| High-normal       | 51–60        | 294                    | 156                      | 1.51 (1.09–2.10) | 0.01    |             | 1.49 (1.07–2.09)       | 0.02    |             |
| Alexithymic       | >60          | 72                     | 48                       | 2.67 (1.55–4.61) | <0.001  |             | 2.56 (1.47–4.45)       | 0.001   |             |
| <i>Men</i>        |              |                        |                          |                  |         |             |                        |         |             |
| Low-normal        | <44          | 98                     | 40                       | 1.00 (reference) |         |             | 1.00 (reference)       |         |             |
| Middle-normal     | 44–50        | 95                     | 38                       | 0.97 (0.54–1.72) | 0.91    | 0.007       | 0.96 (0.54–1.72)       | 0.9     | 0.01        |
| High-normal       | 51–60        | 98                     | 51                       | 1.57 (0.89–2.77) | 0.12    |             | 1.56 (0.88–2.77)       | 0.13    |             |
| Alexithymic       | >60          | 35                     | 23                       | 2.78 (1.24–6.22) | 0.01    |             | 2.55 (1.12–5.82)       | 0.03    |             |
| <i>Women</i>      |              |                        |                          |                  |         |             |                        |         |             |
| Low-normal        | <44          | 180                    | 79                       | 1.00 (reference) |         |             | 1.00 (reference)       |         |             |
| Middle-normal     | 44–50        | 188                    | 78                       | 0.91 (0.60–1.37) | 0.64    | 0.004       | 0.89 (0.58–1.35)       | 0.58    | 0.005       |
| High-normal       | 51–60        | 196                    | 105                      | 1.48 (0.97–2.22) | 0.06    |             | 1.48 (0.98–2.25)       | 0.06    |             |
| Alexithymic       | >60          | 37                     | 25                       | 2.66 (1.26–5.63) | 0.01    |             | 2.59 (1.21–5.53)       | 0.01    |             |

OR: odds ratio; CI: confidence interval.  
 Multivariable adjustment was made for age, gender, marital status, years of education and economic status. In the stratified analyses of gender, ORs were not adjusted for gender.  
 doi:10.1371/journal.pone.0090984.t002

study revealed a negative association between alexithymia and the 7.5-year incidence of compensated claims for low back pain, which was assessed by physician-confirmed diagnoses from administrative workers' compensation data. As the authors mentioned, a possible interpretation of their results is that alexithymic patients with chronic pain were unlikely to complain by filing a workers' compensated claim for low back pain injury because of their fear of being shamed and self-devaluated and/or their shyness and anxiety concerning the verbal expression of their emotions. Further prospective longitudinal studies with an appropriate method for estimating chronic pain are warranted.

**2. Alexithymia, negative affect, and pain**

Alexithymia is a personality trait associated with poor emotional awareness and affect regulation [9]. Our present findings confirm that this trait — in particular the aspect of alexithymia that involves having difficulty identifying one's feelings — is associated with the presence of chronic pain in the general population. This association also becomes nonsignificant when negative affect is controlled, suggesting that negative feelings such as depression and anxiety may mediate the association between alexithymia and chronic pain. This pattern of findings is consistent with previous

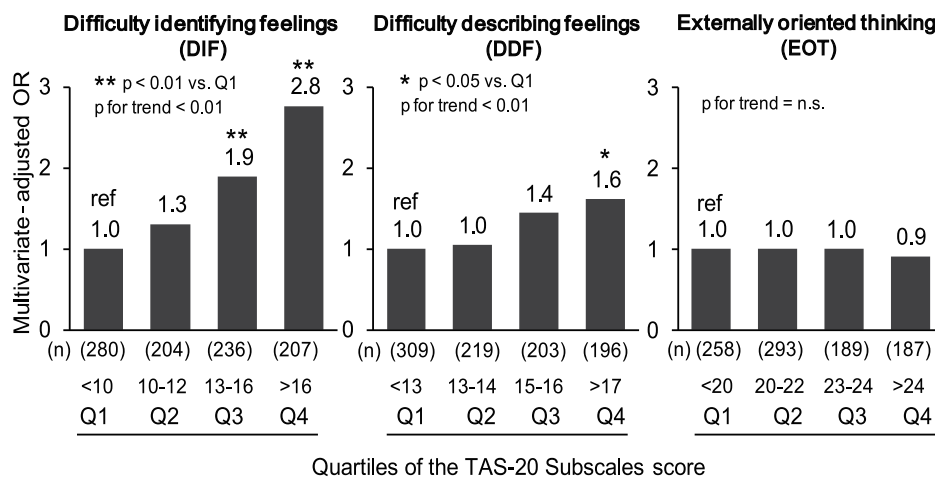

**Figure 2.** Odds ratios for chronic pain according to the TAS-20 subscales, adjusted for demographic factors in the general population.  
 doi:10.1371/journal.pone.0090984.g002

**Table 3.** The relationship between the TAS-20 score levels and the pain-related outcomes of the 439 participants with chronic pain.

|                       | TAS-20 score  |               |               |               | p for trend |
|-----------------------|---------------|---------------|---------------|---------------|-------------|
|                       | Low-normal    | Middle-normal | High-normal   | Alexithymic   |             |
|                       | <44           | 44–50         | 51–60         | >60           |             |
|                       | n = 119       | n = 116       | n = 156       | n = 48        |             |
| Pain intensity, mm    | 30 (15–50)    | 44 (20–54)    | 47 (24–65)    | 58 (36–80)    | <0.001      |
| Disability, mm        | 5 (0–15)      | 15 (0–31)     | 10 (0–38)     | 29 (3–61)     | <0.001      |
| Depression, score     | 0.7 (0.4–0.8) | 0.7 (0.5–1.0) | 0.9 (0.6–1.3) | 1.4 (1.2–1.9) | <0.001      |
| Anxiety, score        | 0.3 (0.2–0.6) | 0.4 (0.2–0.6) | 0.6 (0.4–0.8) | 1.1 (0.8–1.6) | <0.001      |
| Life satisfaction, mm | 75 (50–89)    | 65 (47–81)    | 51 (40–71)    | 50 (38–61)    | <0.001      |

Values are medians (interquartile range).

Pain intensity, disability and life satisfaction were evaluated by Visual Analogue Scale.

Depression and anxiety scores were evaluated by Symptom Check List-90-R.

doi:10.1371/journal.pone.0090984.t003

research involving samples of individuals with chronic pain [13,36].

In addition, our finding that the DIF and DDF domains of the TAS-20 were associated with the likelihood of chronic pain, while the EOT domain was not, is consistent with the findings of previous studies examining alexithymia and pain [7,8,11,14]. The finding may be due to poor reliability of the EOT subscale [37]. Given the cross-cultural consistency of the finding, however, it does not appear to be due to language issues or cultural differences.

### 3. Possible mechanism underlying the association between alexithymia and chronic pain

Various theories linking alexithymia and physical illness have been conceptualized at the physiological level (e.g., the hypothalamic-pituitary-adrenal axis, chronic sympathetic hyperarousal, inflammation, and impaired immune status), the behavioral level, and the cognitive level (e.g., illness behavior, somatic amplification) [38,39]. Some neuroimaging studies of alexithymia and chronic pain have been conducted recently, and their findings may contribute to our understanding of the mechanism of the relationship. First, neuroimaging data indicate not only hyperactivity in pain perception areas such as the insular cortex, but also hypoactivity in pain-processing regulatory areas such as the prefrontal cortex. Lack of an emotional regulation system might cause hypersensitivity to aversive bodily sensations and prolonged, pain-related affective reactions such as distress [40,41]. Second, a possibility is related to the known negative effect of depression on the descending inhibitory system [42]. That is, alexithymia may lead to increased risk of depression, which may then interfere with an individual's ability to reduce or inhibit pain.

### 4. Clinical implications

Our analyses of the subgroup of participants with chronic pain supported a link between alexithymia and a number of measures of the key functioning domains in these individuals, including pain intensity, disability, depression and anxiety (positive associations), and life satisfaction (negative association). To the extent that these associations are causal — a conclusion that cannot yet be drawn due to the correlational nature of the current and previous findings — then treatments that decrease alexithymia could potentially have significant benefits across multiple quality of life domains for individuals with chronic pain. Thus, our findings

support the need for research to develop and test interventions [43,44] that could help individuals identify and describe their feelings, and to determine whether these interventions promote health-related quality of life and reduce the risk for chronic pain as a general health policy.

### 5. Study strengths and limitations

The study has a number of important strengths, including its large sample size and a population-based study design. Some limitations should be noted, however.

One primary limitation is that the data are cross-sectional. We thus cannot conclusively determine if alexithymia influences the presence and severity of negative affect and pain, if negative affect and pain influence alexithymia, or if there is an unidentified third variable that influences all three. However, experts generally agree that alexithymia is a trait that develops early in life and that it rarely changes without active intervention [45]. Thus, the possibility that alexithymia has a greater impact on pain and depression than these variables have on alexithymia remains viable. Prospective longitudinal studies are needed to clarify the contribution of alexithymia to the development of chronic pain and other negative outcomes. A second limitation is related to the possibility of selection bias, because approximately one-half of the individuals who participated in the regular Hisayama Study survey did not participate in our research. Certainly, we cannot deny the possibility that people with physical or mental complaints were more willing to participate in the study than were people without. In contrast, health-conscious people might have been more likely to participate in the study than non-health-conscious people. The fact that the present study population had many more females than males (601 women, 326 men) may support these possibilities [46]. Therefore, the generalizability of our findings to all individuals in the community may be limited. Nevertheless, we believe that our findings provide important information to consider alexithymia as a cognitive factor that may exacerbate physical symptoms such as chronic pain. Third, our questions about the presence of chronic pain have not clearly determined temporal patterns of chronic pain (e.g., it is unclear how a patient with recurrent pain would respond to the questions). A fourth limitation is that the causes of pain were not assessed in this study. It will be informative to explore whether or not the magnitude of the associations between alexithymia and chronic pain is different between participants with pain disorders that have or do not have

one or more established biological causes. However, this limitation is unlikely to alter our conclusion, because previous studies have shown a positive correlation between alexithymia and pain-related outcomes regardless of the presence or absence of biological cause [12,26,27,44,47]. Lastly, pain intensity, disability, and life satisfaction were each assessed with a single-item measure using a VAS, which may have limited reliability of a part of the results compared to assessment that uses multiple-item questionnaires.

## Conclusions

The results of the present study indicate that alexithymia is significantly associated with a greater prevalence of chronic pain in the general population and that individuals with alexithymia have more pain intensity, disability, and depression and anxiety symptoms, and less life satisfaction than those without alexithymia. Our findings highlight certain clinically important concepts; i.e., that adverse psychological factors and personality traits play a significant role in the etiology of chronic pain. The early identification of alexithymia and negative affect may be beneficial in preventing chronic pain and reducing the clinical and economic

burdens of chronic pain. Further prospective studies and interventional studies are needed to confirm this hypothesis.

## Supporting Information

**Figure S1 Flow chart of the participant recruitment.** (EPS)

## Acknowledgments

We thank the staff members of the Division of Health and Welfare of Hisayama, Japan for their cooperation in this study. We thank Tomohiro Ushida for his scientific support and Ryota Nakayama for his technical support in the electronic processing of the data.

## Author Contributions

Conceived and designed the experiments: MS MH. Performed the experiments: MS MH KA SM RI K. Yamashiro TY YI. Analyzed the data: MS TN K. Yonemoto YK. Contributed reagents/materials/analysis tools: MS MH. Wrote the paper: MS TN MPJ KA CK NS YK MH.

## References

1. Tsang A, Von Korff M, Lee S, Alonso J, Karam E, et al. (2008) Common chronic pain conditions in developed and developing countries: gender and age differences and comorbidity with depression-anxiety disorders. *J Pain* 9: 883–891.
2. Committee on Advancing Pain Research, Care, and Education, Institute of Medicine (2011) *Relieving Pain in America: A Blueprint for Transforming Prevention, Care, Education, and Research*: The National Academies Press. 62 p.
3. Phillips CJ (2006) Economic burden of chronic pain. *Expert Rev Pharmacoecon Outcomes Res* 6: 591–601.
4. Manchikanti L, Fellows B, Singh V (2002) Understanding psychological aspects of chronic pain in interventional pain management. *Pain Physician* 5: 57–82.
5. Sharp J, Keefe B (2005) Psychiatry in chronic pain: a review and update. *Curr Psychiatry Rep* 7: 213–219.
6. Tunks ER, Crook J, Weir R (2008) Epidemiology of chronic pain with psychological comorbidity: prevalence, risk, course, and prognosis. *Can J Psychiatry* 53: 224–234.
7. Lumley MA, Radcliffe AM, Macklem DJ, Mosley-Williams A, Leisen JC, et al. (2005) Alexithymia and pain in three chronic pain samples: comparing Caucasians and African Americans. *Pain Med* 6: 251–261.
8. Mehling WE, Krause N (2005) Are difficulties perceiving and expressing emotions associated with low-back pain? The relationship between lack of emotional awareness (alexithymia) and 12-month prevalence of low-back pain in 1180 urban public transit operators. *J Psychosom Res* 58: 73–81.
9. Bagby RM, Taylor GJ (1997) Disorders of affect regulation: Alexithymia in Medical and Psychiatric Illness. Cambridge University Press. Taylor GJ, Bagby RM, Parker JDA, editors. chapter 2 Affect dysregulation and alexithymia pp. 30–32.
10. Sifneos PE (1973) The prevalence of 'alexithymic' characteristics in psychosomatic patients. *Psychother Psychosom* 22: 255–262.
11. Bagby RM, Parker JD, Taylor GJ (1994) The twenty-item Toronto Alexithymia Scale—I. Item selection and cross-validation of the factor structure. *J Psychosom Res* 38: 23–32.
12. Hosoi M, Molton IR, Jensen MP, Ehde DM, Amtmann S, et al. (2010) Relationships among alexithymia and pain intensity, pain interference, and vitality in persons with neuromuscular disease: Considering the effect of negative affectivity. *Pain* 149: 273–277.
13. Makino S, Jensen MP, Arimura T, Obata T, Anno K, et al. (2013) Alexithymia and chronic pain: the role of negative affectivity. *Clin J Pain* 29: 354–361.
14. Huber A, Suman AL, Biasi G, Carli G (2009) Alexithymia in fibromyalgia syndrome: associations with ongoing pain, experimental pain sensitivity and illness behavior. *J Psychosom Res* 66: 425–433.
15. Porcelli P, Tulpani C, Maiello E, Cilenti G, Todarello O (2007) Alexithymia, coping, and illness behavior correlates of pain experience in cancer patients. *Psychooncology* 16: 644–650.
16. Ohmura T, Ueda K, Kiyohara Y, Kato I, Iwamoto H, et al. (1993) Prevalence of type 2 (non-insulin-dependent) diabetes mellitus and impaired glucose tolerance in the Japanese general population: the Hisayama Study. *Diabetologia* 36: 1198–1203.
17. Messina A, Fogliani AM, Paradiso S (2011) Alexithymia in oncologic disease: association with cancer invasion and hemoglobin levels. *Ann Clin Psychiatry* 23: 125–130.
18. Moriguchi Y, Maeda M, Igarashi T, Ishikawa T, Shoji M, et al. (2007) Age and gender effect on alexithymia in large, Japanese community and clinical samples: a cross-validation study of the Toronto Alexithymia Scale (TAS-20). *Biopsychosoc Med* 1: 7.
19. Group TITW (2011) Classification of chronic pain. Descriptions of Chronic Pain Syndromes and Definitions of Pain Terms. Second Edition (Revised). The IASP Press. Part 1. Topics and codes. Available: <https://www.iasp-pain.org/Content/NavigationMenu/Publications/FreeBooks/Classification>
20. Dworkin RH, Turk DC, Peirce-Sandner S, Baron R, Bellamy N, et al. (2010) Research design considerations for confirmatory chronic pain clinical trials: IMMPACT recommendations. *Pain* 149: 177–193.
21. Hawker GA, Mian S, Kendzerska T, French M (2011) Measures of adult pain: Visual Analog Scale for Pain (VAS Pain), Numeric Rating Scale for Pain (NRS Pain), McGill Pain Questionnaire (MPQ), Short-Form McGill Pain Questionnaire (SF-MPQ), Chronic Pain Grade Scale (CPGS), Short Form-36 Bodily Pain Scale (SF-36 BPS), and Measure of Intermittent and Constant Osteoarthritis Pain (ICOAP). *Arthritis Care Res (Hoboken)* 63 Suppl 11: S240–252.
22. Boonstra AM, Schiphorst Preuper HR, Reneman MF, Posthumus JB, Stewart RE (2008) Reliability and validity of the visual analogue scale for disability in patients with chronic musculoskeletal pain. *Int J Rehabil Res* 31: 165–169.
23. Matsubayashi K, Wada T, Okumiyama K, Fujisawa M, Taoka H, et al. (1994) [Comparative study of quality of life in the elderly between in Kahoku and in Yaku]. *Nihon Ronen Igakkai Zasshi* 31: 790–799.
24. Tomioka M, Shimura M, Hidaka M, Kubo C (2008) The reliability and validity of a Japanese version of symptom checklist 90 revised. *Biopsychosoc Med* 2: 19.
25. Cheng YH, Chi I, Boey KW, Ko LS, Chou KL (2002) Self-rated economic condition and the health of elderly persons in Hong Kong. *Soc Sci Med* 55: 1415–1424.
26. Mattila AK, Salminen JK, Nummi T, Joukamaa M (2006) Age is strongly associated with alexithymia in the general population. *J Psychosom Res* 61: 629–635.
27. Franz M, Popp K, Schaefer R, Sitte W, Schneider C, et al. (2008) Alexithymia in the German general population. *Soc Psychiatry Psychiatr Epidemiol* 43: 54–62.
28. Celikel FC, Saatcioglu O (2006) Alexithymia and anxiety in female chronic pain patients. *Ann Gen Psychiatry* 5: 13.
29. Lumley MA, Asselin LA, Norman S (1997) Alexithymia in chronic pain patients. *Compr Psychiatry* 38: 160–165.
30. Pecukonis EV (2009) Physical self-efficacy and alexithymia in women with chronic intractable back pain. *Pain Manag Nurs* 10: 116–123.
31. Kosturek A, Gregory RJ, Sousou AJ, Trief P (1998) Alexithymia and somatic amplification in chronic pain. *Psychosomatics* 39: 399–404.
32. Valkamo M, Hintikka J, Niskanen L, Viinamaki H (2001) Psychiatric morbidity and the presence and absence of angiographic coronary disease in patients with chest pain. *Acta Psychiatr Scand* 104: 391–396.
33. Wise TN, Mann LS, Jani N, Jani S (1994) Illness beliefs and alexithymia in headache patients. *Headache* 34: 362–365.
34. Gregory RJ, Manning J, Wade MJ (2005) Personality traits related to chronic pain location. *Ann Clin Psychiatry* 17: 59–64.
35. Mehling WE, Krause N (2007) Alexithymia and 7.5-year incidence of compensated low back pain in 1207 urban public transit operators. *J Psychosom Res* 62: 667–674.

36. Saariaho AS, Saariaho TH, Mattila AK, Karukivi MR, Joukamaa MI (2013) Alexithymia and depression in a chronic pain patient sample. *Gen Hosp Psychiatry* 35: 239–245.
37. Kooiman CG, Spinhoven P, Trijsburg RW (2002) The assessment of alexithymia: a critical review of the literature and a psychometric study of the Toronto Alexithymia Scale-20. *J Psychosom Res* 53: 1083–1090.
38. Lumley MA (2007) The assessment of alexithymia in medical settings: implications for understanding and treating health problems. *Journal of personality assessment* 89: 230–246.
39. Lumley MA (1996) How are alexithymia and physical illness linked? A review and critique of pathways. *J Psychosom Res* 41: 505–518.
40. Kano M, Fukudo S (2013) The alexithymic brain: the neural pathways linking alexithymia to physical disorders. *Biopsychosoc Med* 7: 1.
41. Kano M, Hamaguchi T, Itoh M, Yanai K, Fukudo S (2007) Correlation between alexithymia and hypersensitivity to visceral stimulation in human. *Pain* 132: 252–263.
42. Mico JA, Ardid D, Berrocoso E, Eschaliere A (2006) Antidepressants and pain. *Trends Pharmacol Sci* 27: 348–354.
43. Spek V (2008) Alexithymia and cognitive behaviour therapy outcome for subthreshold depression. *Acta Psychiatr Scand* 118: 164–167.
44. Tulipani C, Morelli F, Spedicato MR, Maiello E, Todarello O, et al. (2010) Alexithymia and cancer pain: the effect of psychological intervention. *Psychother Psychosom* 79: 156–163.
45. Tolmunen T, Heliste M, Lehto SM, Hintikka J, Honkalampi K, et al. (2011) Stability of alexithymia in the general population: an 11-year follow-up. *Compr Psychiatry* 52: 536–541.
46. Kroenke K, Spitzer RL (1998) Gender differences in the reporting of physical and somatoform symptoms. *Psychosom Med* 60: 150–155.
47. Lumley MA, Tomakowsky J, Torosian T (1997) The relationship of alexithymia to subjective and biomedical measures of disease. *Psychosomatics* 38: 497–502.
